# Supplementary material
Source: PubMed Central journal article supplement (PMC7529013)
Supplement: jiaa257_suppl_supplementary_material.pdf [file jiaa257_suppl_supplementary_material.pdf]

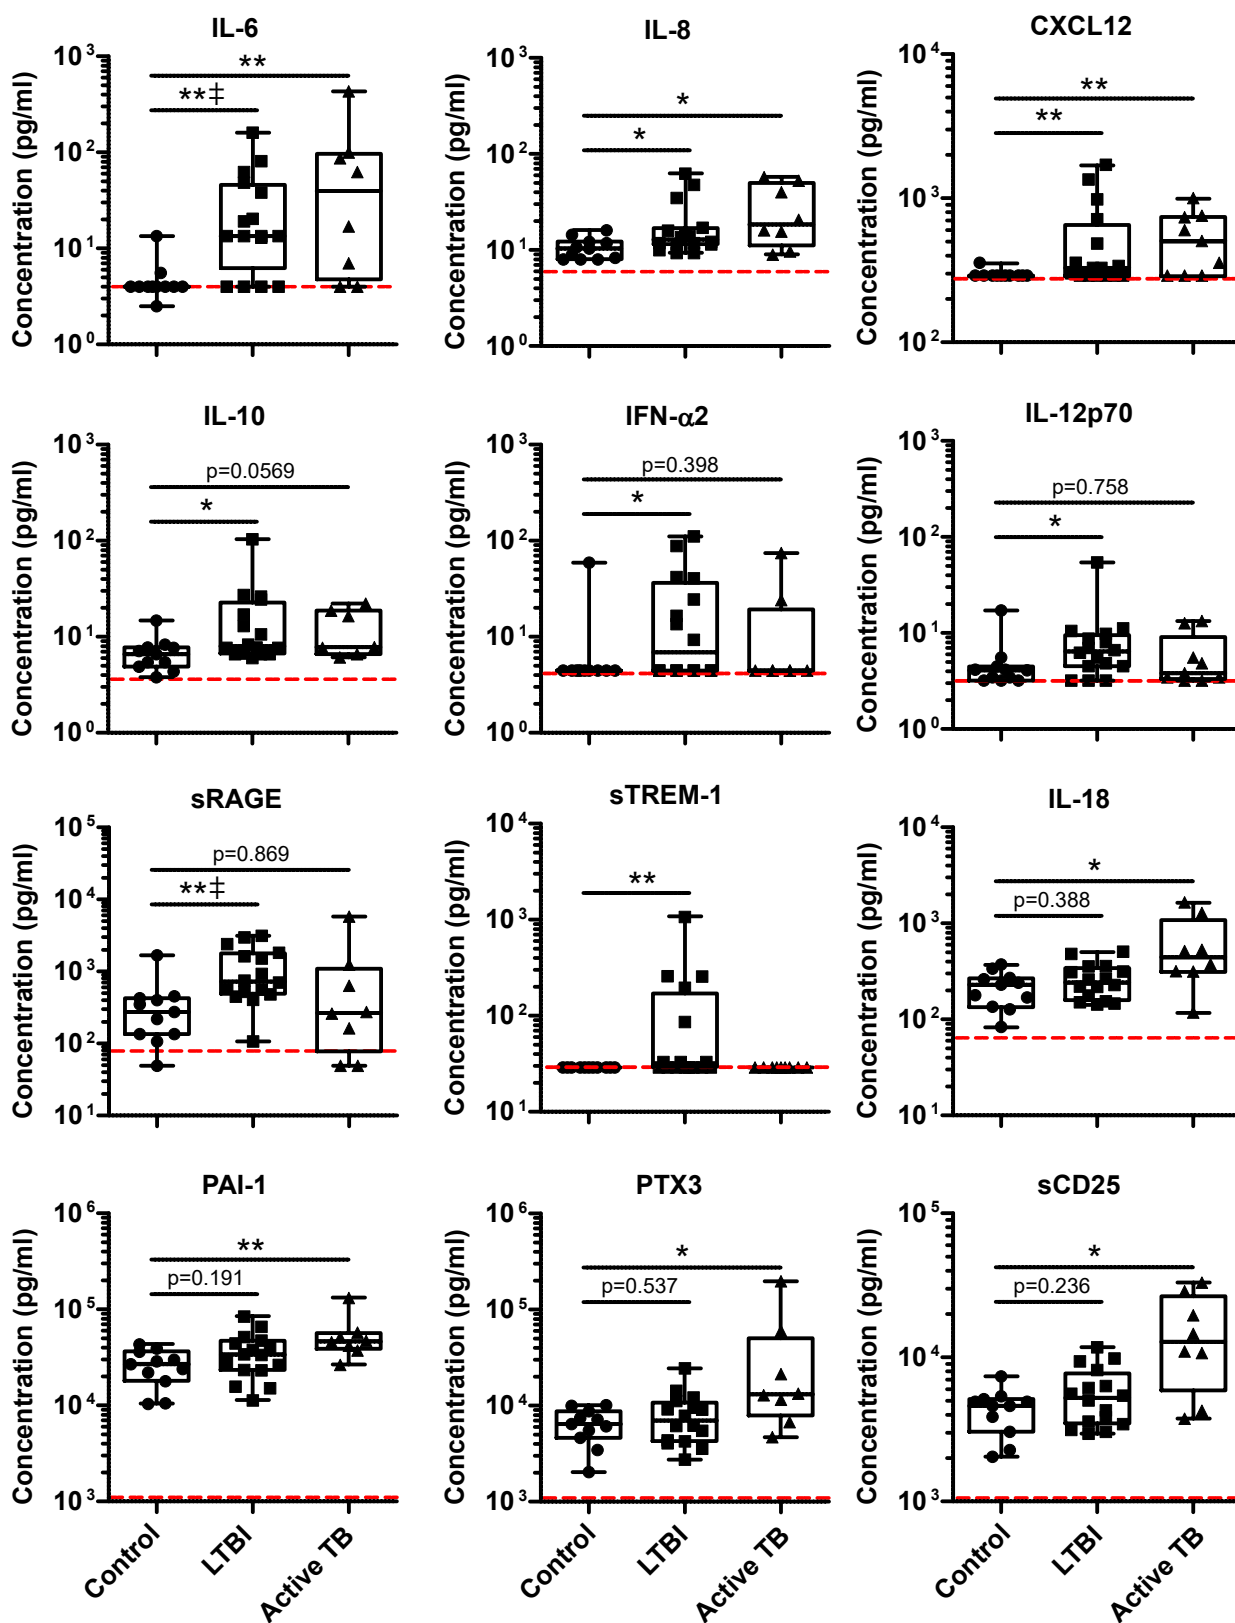

Supplementary Figure 1A

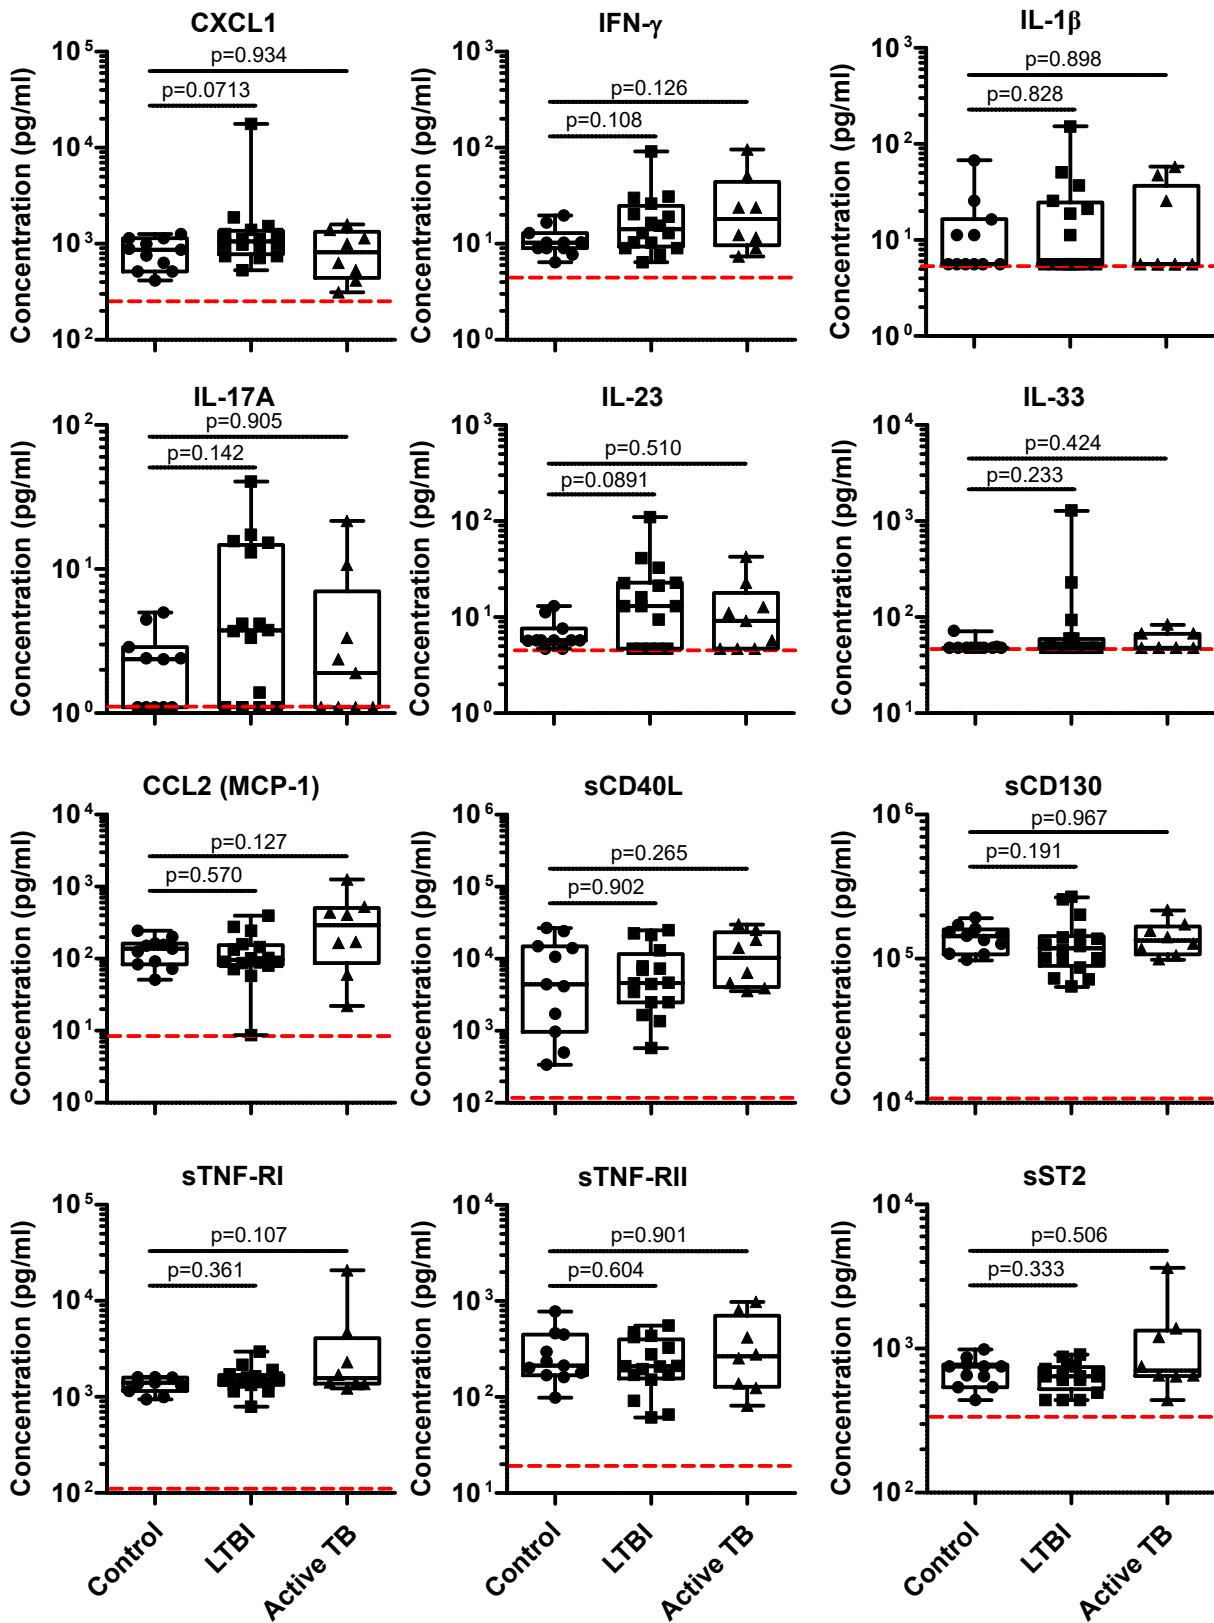

Supplementary Figure 1B

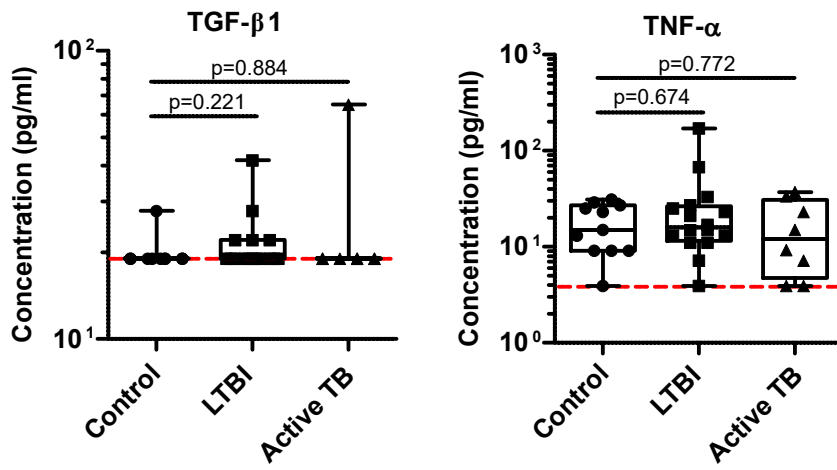

Supplementary Figure 1C

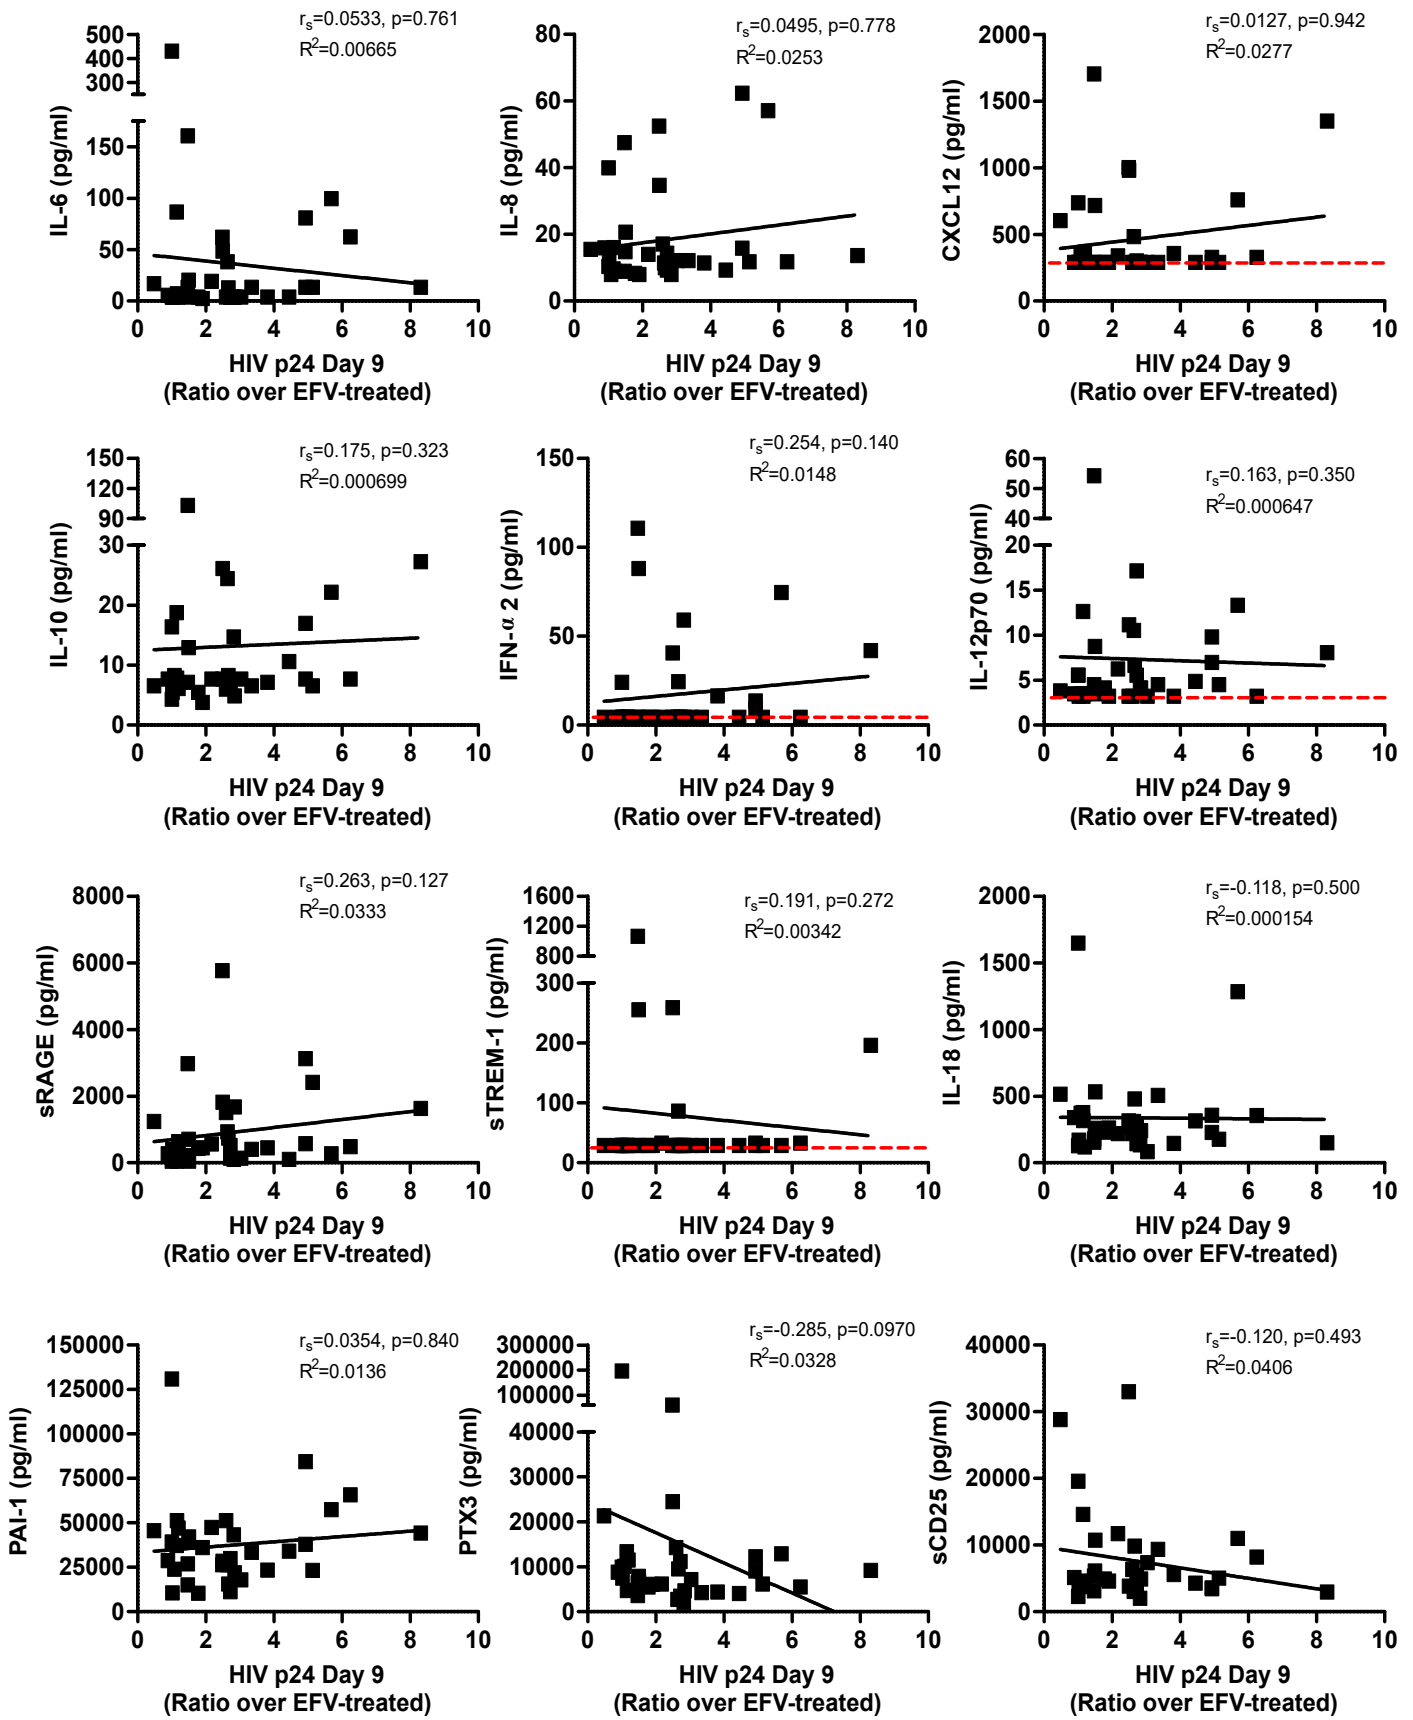

Supplementary Figure 2A

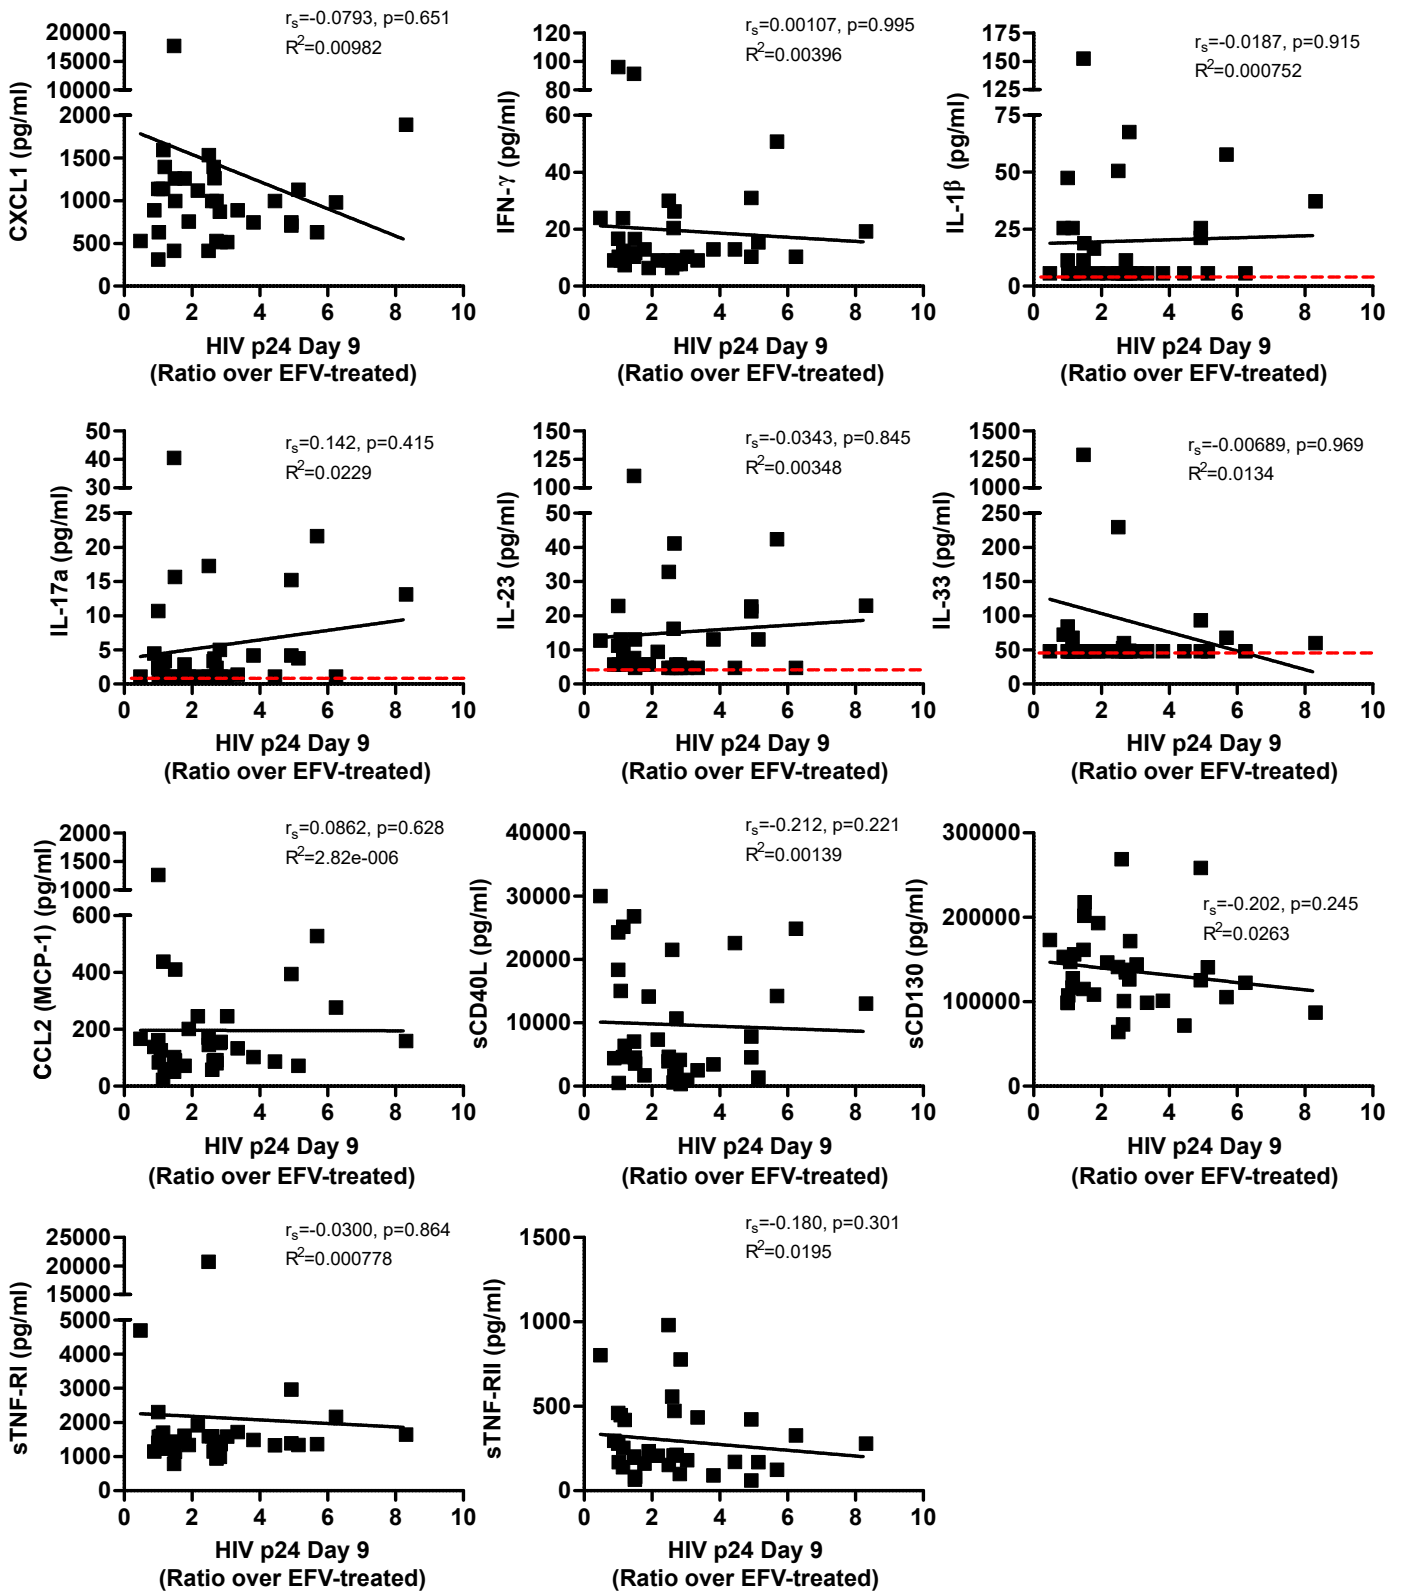

Supplementary Figure 2B

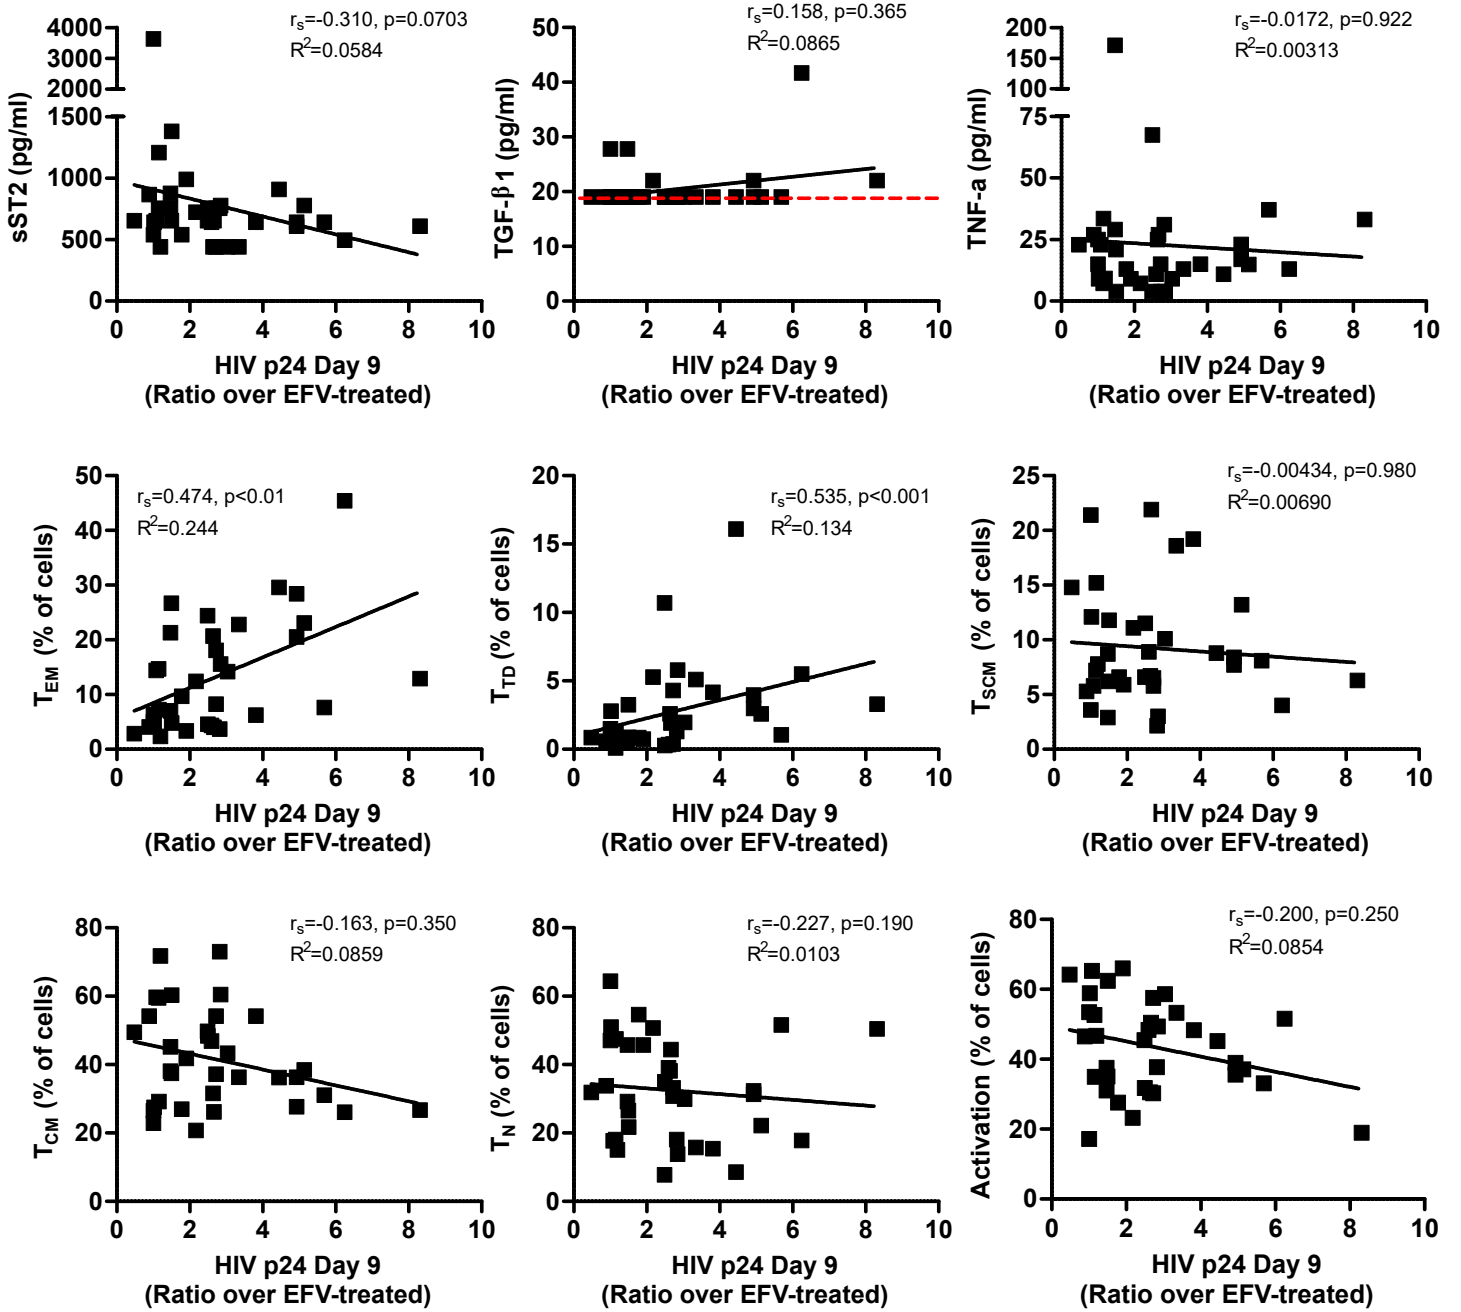

Supplementary Figure 2C
